# Supplementary material for: Directed migration of additives to form top interlayers in polymer light emitting diodes
Source: Royal Society of Chemistry journal article supplement (doi:10.1039/c7tc04586g), 2017-01-01
Supplement: c7tc04586g1.pdf [file c7tc04586g1.pdf]

### Supplementary Information

## Directed migration of additives to form top interlayers in polymer light emitting diodes

L. Nouzman and G. L. Frey

Department of Materials Science and Engineering, Technion – Israel Institute of Technology, Haifa 32000, Israel

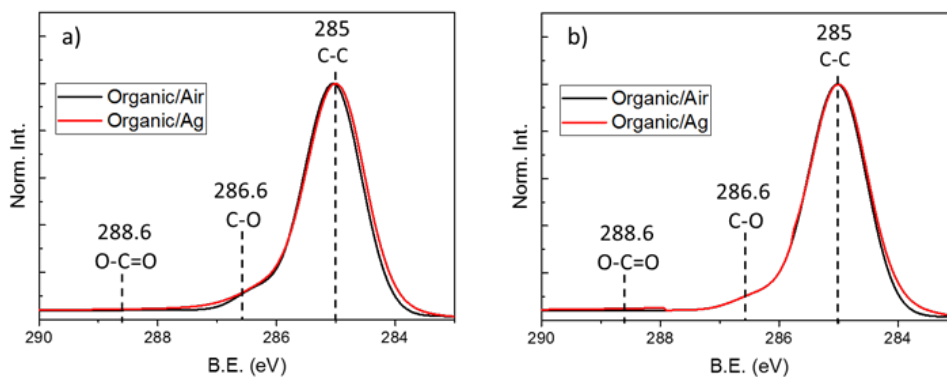

**Figure S1.** C1s XPS spectra of pristine F8BT (a) and F8BT with 0.75 mg/ml PEG (b) measured on the bare organic surface (black lines) and through ~3 nm Ag film (red line). The absence of traces at 286.6 eV in all spectra confirms that PEG does not migrate to the F8BT/Ag interface.

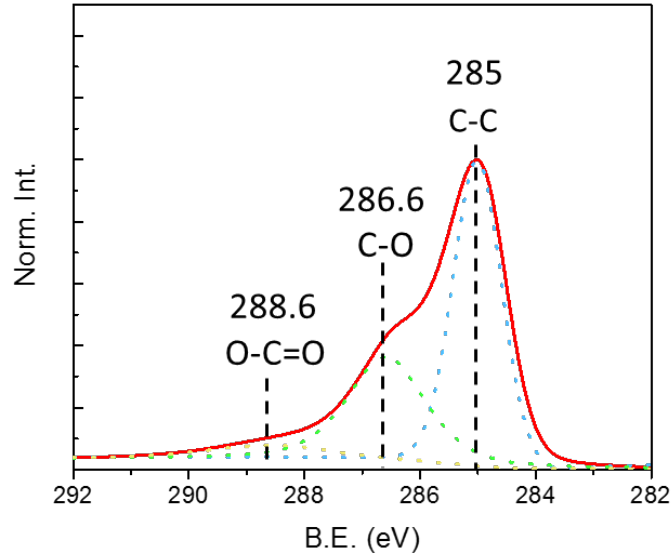

**Figure S2.** Deconvoluted C1s spectra of F8BT with 0.75 mg/ml PEG measured through ~3nm Al.

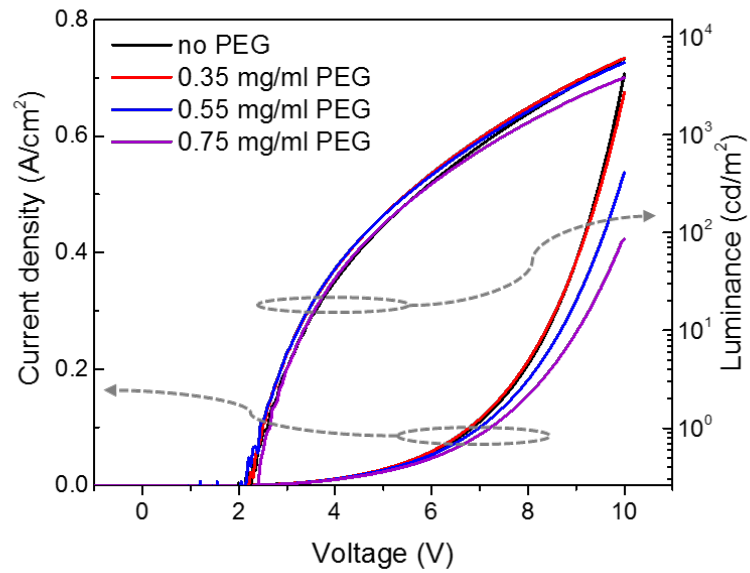

**Figure S3.** J-V-L characteristics of devices with SY that were annealed prior to Al deposition.
